# Supplementary material for: Analysis of Fungal Microbiomes in Edible Medicinal Morindae Officinalis Radix and Alpiniae Oxyphyllae Fructus Using DNA Metabarcoding
Source: MDPI journal article supplement (doi:10.3390/foods11121748), 2022-06-14
Supplement: s1 [file s1]

Supplementary material

# Analysis of fungal microbiome in edible-medicinal *Morindae Officinalis Radix* and *Alpiniae Oxyphyllae Fructus* using DNA metabarcoding

Wenjun Jiang<sup>1,†</sup>, Xuyu Chen<sup>2,†</sup>, Mengyue Guo<sup>1</sup>, Jingsheng Yu<sup>1</sup>, Meihua Yang<sup>1</sup> and Xiaohui Pang<sup>1,\*</sup>

<sup>1</sup> Institute of Medicinal Plant Development, Chinese Academy of Medical Sciences & Peking Union Medical College, Beijing 100193, China; wenjunjiang0927@gmail.com (W. J.), guomy0908@hotmail.com (M. G.), yujsIMPLAD@hotmail.com (J.Y.), mhyang@implad.ac.cn (M. Y.)

<sup>2</sup> Hainan Provincial Key Laboratory of Resources Conservation and Development of Southern Medicine, Hainan Branch of the Institute of Medicinal Plant Development, Chinese Academy of Medical Sciences & Peking Union Medical College, Haikou 570311, China; chenxuyu-11@163.com (X. C.)

\* Correspondence: xhpang@implad.ac.cn

† These authors contributed equally to this work.

**Table S1.** Taxonomical classification of OTUs.

| ID     | taxonomy                                                                                                                                  |
|--------|-------------------------------------------------------------------------------------------------------------------------------------------|
| OTU_1  | k__Fungi;p__Ascomycota;c__Dothideomycetes;o__Capnodiales;f__Cladosporiaceae;g__Cladosporium;s__                                           |
| OTU_2  | k__Fungi;p__c__o__f__g__s__                                                                                                               |
| OTU_3  | k__Fungi;p__Ascomycota;c__Eurotiomycetes;o__Eurotiales;f__Aspergillaceae;g__Penicillium;s__                                               |
| OTU_4  | k__Fungi;p__c__o__f__g__s__                                                                                                               |
| OTU_5  | k__Fungi;p__Ascomycota;c__Eurotiomycetes;o__Eurotiales;f__Aspergillaceae;g__Penicillium;s__                                               |
| OTU_6  | k__Fungi;p__Basidiomycota;c__Tremellomycetes;o__Tremellales;f__Rhynchogastremataceae;g__Papiotrema;s__Papiotrema_aurea                    |
| OTU_7  | k__Fungi;p__Basidiomycota;c__Tremellomycetes;o__Filobasidiales;f__Filobasidiaceae;g__Naganishia;s__                                       |
| OTU_8  | k__Fungi;p__Ascomycota;c__Sordariomycetes;o__Hypocreales;f__Hypocreaceae;g__Trichoderma;s__                                               |
| OTU_9  | k__Fungi;p__Ascomycota;c__Sordariomycetes;o__Hypocreales;f__Hypocreaceae;g__Trichoderma;s__Trichoderma                                    |
| OTU_10 | k__Fungi;p__Ascomycota;c__Eurotiomycetes;o__Eurotiales;f__Aspergillaceae;g__Monascus;s__Monascus_sanguineus                               |
| OTU_11 | k__Fungi;p__Ascomycota;c__Eurotiomycetes;o__Eurotiales;f__Aspergillaceae;g__Penicillium;s__Penicillium_hispanicum                         |
| OTU_12 | k__Fungi;p__Basidiomycota;c__Tremellomycetes;o__Tremellales;f__Bulleribasidiaceae;g__Hannaella;s__Hannaella_oryzae                        |
| OTU_13 | k__Fungi;p__Ascomycota;c__Saccharomycetes;o__Saccharomycetales;f__Saccharomycetales_fam_Incertae_sedis;g__Candida;s__Candida_parapsilosis |
| OTU_14 | k__Fungi;p__Ascomycota;c__Eurotiomycetes;o__Eurotiales;f__Aspergillaceae;g__Penicillium;s__                                               |
| OTU_15 | k__Fungi;p__Ascomycota;c__Eurotiomycetes;o__Eurotiales;f__Trichocomaceae;g__Talaromyces;s__                                               |
| OTU_16 | k__Fungi;p__Ascomycota;c__Eurotiomycetes;o__Chaetothyriales;f__Cyphellophoraceae;g__Cyphellophora;s__Cyphellophora_europaea               |
| OTU_17 | k__Fungi;p__Ascomycota;c__Saccharomycetes;o__Saccharomycetales;f__Saccharomycetales_fam_Incertae_sedis;g__Candida;s__Candida_tropicalis   |
| OTU_18 | k__Fungi;p__Basidiomycota;c__Microbotryomycetes;o__Sporidiobolales;f__Sporidiobolaceae;g__Rhodotorula;s__                                 |
| OTU_19 | k__Fungi;p__Ascomycota;c__Sordariomycetes;o__Hypocreales;f__Nectriaceae;g__Fusarium;s__                                                   |
| OTU_20 | k__Fungi;p__Basidiomycota;c__Tremellomycetes;o__Tremellales;f__g__s__                                                                     |
| OTU_21 | k__Fungi;p__c__o__f__g__s__                                                                                                               |
| OTU_22 | k__Fungi;p__Ascomycota;c__Eurotiomycetes;o__Eurotiales;f__Aspergillaceae;g__Penicillium;s__                                               |
| OTU_23 | k__Fungi;p__Ascomycota;c__Sordariomycetes;o__Hypocreales;f__Nectriaceae;g__Fusarium;s__                                                   |
| OTU_24 | k__Fungi;p__Ascomycota;c__Eurotiomycetes;o__Eurotiales;f__Trichocomaceae;g__Xerochrysium;s__                                              |
| OTU_25 | k__Fungi;p__Ascomycota;c__Dothideomycetes;o__Pleosporales;f__Cucurbitariaceae;g__Pyrenochaeta;s__Pyrenochaeta_unguis-hominis              |

---

|        |                                                                                                                                   |
|--------|-----------------------------------------------------------------------------------------------------------------------------------|
| OTU_26 | k__Fungi;p__Ascomycota;c__Eurotiomycetes;o__Eurotiales;f__Aspergillaceae;g__Xeromyces;s__Xeromyces_bisporus                       |
| OTU_27 | k__Fungi;p__Basidiomycota;c__Tremellomycetes;o__Tremellales;f__Rhynchogastremataceae;g__Papiliotrema;s__Papiliotrema_flavescens   |
| OTU_28 | k__Fungi;p__;c__;o__;f__;g__;s__                                                                                                  |
| OTU_29 | k__Fungi;p__Ascomycota;c__Sordariomycetes;o__Hypocreales;f__Nectriaceae;g__Volutella;s__                                          |
| OTU_30 | k__Fungi;p__Basidiomycota;c__Microbotryomycetes;o__Sporidiobolales;f__Sporidiobolaceae;g__Rhodotorula;s__Rhodotorula_mucilaginosa |
| OTU_31 | k__Fungi;p__;c__;o__;f__;g__;s__                                                                                                  |
| OTU_32 | k__Fungi;p__Ascomycota;c__Eurotiomycetes;o__Eurotiales;f__Aspergillaceae;g__Aspergillus;s__                                       |
| OTU_33 | k__Fungi;p__Ascomycota;c__Eurotiomycetes;o__Eurotiales;f__Trichocomaceae;g__Talaromyces;s__                                       |
| OTU_34 | k__Fungi;p__;c__;o__;f__;g__;s__                                                                                                  |
| OTU_35 | k__Fungi;p__Ascomycota;c__Dothideomycetes;o__Capnodiales;f__Cladosporiaceae;g__Cladosporium;s__                                   |
| OTU_36 | k__Fungi;p__Ascomycota;c__Dothideomycetes;o__Pleosporales;f__Pleosporaceae;g__Alternaria;s__                                      |
| OTU_37 | k__Fungi;p__;c__;o__;f__;g__;s__                                                                                                  |
| OTU_38 | k__Fungi;p__Ascomycota;c__Eurotiomycetes;o__Eurotiales;f__Aspergillaceae;g__Penicillium;s__                                       |
| OTU_39 | k__Fungi;p__;c__;o__;f__;g__;s__                                                                                                  |
| OTU_40 | k__Fungi;p__;c__;o__;f__;g__;s__                                                                                                  |
| OTU_41 | k__Fungi;p__;c__;o__;f__;g__;s__                                                                                                  |
| OTU_42 | k__Fungi;p__Basidiomycota;c__Tremellomycetes;o__Tremellales;f__Tremellaceae;g__Cryptococcus;s__                                   |
| OTU_43 | k__Fungi;p__Ascomycota;c__Eurotiomycetes;o__Eurotiales;f__Aspergillaceae;g__Penicillium;s__                                       |
| OTU_44 | k__Fungi;p__Ascomycota;c__Dothideomycetes;o__Pleosporales;f__;g__;s__                                                             |
| OTU_45 | k__Fungi;p__Ascomycota;c__Eurotiomycetes;o__Eurotiales;f__Aspergillaceae;g__Aspergillus;s__Aspergillus_versicolor                 |
| OTU_46 | k__Fungi;p__Basidiomycota;c__Tremellomycetes;o__Tremellales;f__Sirobasidiaceae;g__Sirobasidium;s__                                |
| OTU_47 | k__Fungi;p__Ascomycota;c__Eurotiomycetes;o__Eurotiales;f__Trichocomaceae;g__Talaromyces;s__                                       |
| OTU_48 | k__Fungi;p__;c__;o__;f__;g__;s__                                                                                                  |
| OTU_49 | k__Fungi;p__Ascomycota;c__Sordariomycetes;o__Sordariales;f__Lasiosphaeriaceae;g__Fimetariella;s__Fimetariella_rabenhorstii        |
| OTU_50 | k__Fungi;p__Ascomycota;c__Saccharomycetes;o__Saccharomycetales;f__Debaryomycetaceae;g__Meyerozyma;s__                             |
| OTU_51 | k__Fungi;p__;c__;o__;f__;g__;s__                                                                                                  |
| OTU_52 | k__Fungi;p__;c__;o__;f__;g__;s__                                                                                                  |
| OTU_53 | k__Fungi;p__Basidiomycota;c__Tremellomycetes;o__Tremellales;f__Bulleribasidiaceae;g__Hannaella;s__                                |
| OTU_54 | k__Fungi;p__;c__;o__;f__;g__;s__                                                                                                  |
| OTU_55 | k__Fungi;p__;c__;o__;f__;g__;s__                                                                                                  |
| OTU_56 | k__Fungi;p__Ascomycota;c__Saccharomycetes;o__Saccharomycetales;f__Debaryomycetaceae;g__Yamadazyma;s__                             |
| OTU_57 | k__Fungi;p__;c__;o__;f__;g__;s__                                                                                                  |
| OTU_58 | k__Fungi;p__Basidiomycota;c__Cystobasidiomycetes;o__Cystobasidiales;f__Cystobasidiaceae;g__;s__                                   |
| OTU_59 | k__Fungi;p__Ascomycota;c__Dothideomycetes;o__Pleosporales;f__Phaeosphaeriaceae;g__;s__                                            |
| OTU_60 | k__Fungi;p__Basidiomycota;c__Tremellomycetes;o__Tremellales;f__Rhynchogastremataceae;g__Papiliotrema;s__                          |
| OTU_61 | k__Fungi;p__Ascomycota;c__Dothideomycetes;o__Pleosporales;f__Phaeosphaeriaceae;g__Phaeosphaeria;s__                               |
| OTU_62 | k__Fungi;p__Basidiomycota;c__Tremellomycetes;o__Filobasidiales;f__Filobasidiaceae;g__Naganishia;s__                               |
| OTU_63 | No blast hit                                                                                                                      |
| OTU_64 | k__Fungi;p__;c__;o__;f__;g__;s__                                                                                                  |
| OTU_65 | k__Fungi;p__;c__;o__;f__;g__;s__                                                                                                  |
| OTU_66 | k__Fungi;p__Ascomycota;c__;o__;f__;g__;s__                                                                                        |
| OTU_67 | k__Fungi;p__;c__;o__;f__;g__;s__                                                                                                  |
| OTU_68 | k__Fungi;p__Basidiomycota;c__Tremellomycetes;o__Tremellales;f__Rhynchogastremataceae;g__Papiliotrema;s__Papiliotrema_laurentii    |
| OTU_69 | k__Fungi;p__;c__;o__;f__;g__;s__                                                                                                  |
| OTU_70 | k__Fungi;p__Ascomycota;c__Eurotiomycetes;o__Eurotiales;f__Aspergillaceae;g__Aspergillus;s__                                       |
| OTU_71 | k__Fungi;p__;c__;o__;f__;g__;s__                                                                                                  |
| OTU_72 | k__Fungi;p__Ascomycota;c__Saccharomycetes;o__Saccharomycetales;f__Debaryomycetaceae;g__Meyerozyma;s__                             |
| OTU_73 | k__Fungi;p__Ascomycota;c__Eurotiomycetes;o__Eurotiales;f__Aspergillaceae;g__Penicillium;s__                                       |
| OTU_74 | k__Fungi;p__Basidiomycota;c__Tremellomycetes;o__Tremellales;f__Bulleraceae;g__Bullera;s__Bullera_penniseticola                    |
| OTU_75 | k__Fungi;p__Basidiomycota;c__Agaricomycetes;o__Agaricales;f__Tricholomataceae;g__Tricholoma;s__Tricholoma_matsutake               |

---

|         |                                                                                                                                           |
|---------|-------------------------------------------------------------------------------------------------------------------------------------------|
| OTU_76  | k__Fungi;p__Ascomycota;c__Eurotiomycetes;o__Chaetothyriales;f__Herpotrichiellaceae;g__Rhinocladiella;s__                                  |
| OTU_77  | k__Fungi;p__c__o__f__g__s__                                                                                                               |
| OTU_78  | k__Fungi;p__Ascomycota;c__Saccharomycetes;o__Saccharomycetales;f__g__s__                                                                  |
| OTU_79  | k__Fungi;p__Ascomycota;c__Eurotiomycetes;o__Eurotiales;f__Trichocomaceae;g__Talaromyces;s__                                               |
| OTU_80  | k__Fungi;p__Ascomycota;c__Saccharomycetes;o__Saccharomycetales;f__Saccharomycetales_fam_Incertae_sedis;g__Candida;s__Candida_metapsilosis |
| OTU_81  | k__Fungi;p__Ascomycota;c__Sordariomycetes;o__Microascales;f__Ceratocystidaceae;g__Ceratocystis;s__                                        |
| OTU_82  | k__Fungi;p__c__o__f__g__s__                                                                                                               |
| OTU_83  | k__Fungi;p__Ascomycota;c__Eurotiomycetes;o__Eurotiales;f__Aspergillaceae;g__Penicillium;s__                                               |
| OTU_84  | k__Fungi;p__c__o__f__g__s__                                                                                                               |
| OTU_85  | k__Fungi;p__Ascomycota;c__Sordariomycetes;o__Glomerellales;f__Glomerellaceae;g__Colletotrichum;s__                                        |
| OTU_86  | k__Fungi;p__Ascomycota;c__Eurotiomycetes;o__Eurotiales;f__Trichocomaceae;g__Talaromyces;s__                                               |
| OTU_87  | k__Fungi;p__Basidiomycota;c__Cystobasidiomycetes;o__Cystobasidiales;f__Cystobasidiaceae;g__Occultifur;s__Occultifur_externus              |
| OTU_88  | k__Fungi;p__Ascomycota;c__Eurotiomycetes;o__Chaetothyriales;f__Trichomeriaceae;g__Knufia;s__                                              |
| OTU_89  | k__Fungi;p__Ascomycota;c__Sordariomycetes;o__Sordariales;f__Cephalothecaceae;g__Phialemonium;s__                                          |
| OTU_90  | k__Fungi;p__Basidiomycota;c__Wallemiomycetes;o__Wallemiales;f__Wallemiaceae;g__Wallemia;s__Wallemia_melliola                              |
| OTU_91  | k__Fungi;p__c__o__f__g__s__                                                                                                               |
| OTU_92  | k__Fungi;p__Ascomycota;c__Sordariomycetes;o__Hypocreales;f__Clavicipitaceae;g__Paecilomyces;s__                                           |
| OTU_93  | k__Fungi;p__Ascomycota;c__Eurotiomycetes;o__Eurotiales;f__Trichocomaceae;g__Talaromyces;s__                                               |
| OTU_94  | k__Fungi;p__Ascomycota;c__Saccharomycetes;o__Saccharomycetales;f__Saccharomycetales_fam_Incertae_sedis;g__Candida;s__                     |
| OTU_95  | k__Fungi;p__c__o__f__g__s__                                                                                                               |
| OTU_96  | k__Fungi;p__c__o__f__g__s__                                                                                                               |
| OTU_97  | k__Fungi;p__c__o__f__g__s__                                                                                                               |
| OTU_98  | k__Fungi;p__c__o__f__g__s__                                                                                                               |
| OTU_99  | k__Fungi;p__Ascomycota;c__Eurotiomycetes;o__Eurotiales;f__Aspergillaceae;g__Penicillium;s__                                               |
| OTU_100 | k__Fungi;p__Ascomycota;c__Sordariomycetes;o__Hypocreales;f__Nectriaceae;g__s__                                                            |
| OTU_101 | k__Fungi;p__Basidiomycota;c__Microbotryomycetes;o__Sporidiobolales;f__Sporidiobolaceae;g__Rhodotorula;s__                                 |
| OTU_102 | k__Fungi;p__c__o__f__g__s__                                                                                                               |
| OTU_103 | k__Fungi;p__Ascomycota;c__Sordariomycetes;o__Hypocreales;f__Nectriaceae;g__Fusicolla;s__                                                  |
| OTU_104 | k__Fungi;p__Basidiomycota;c__Tremellomycetes;o__Tremellales;f__Rhynchogastremataceae;g__Papiliotrema;s__                                  |
| OTU_105 | k__Fungi;p__c__o__f__g__s__                                                                                                               |
| OTU_106 | k__Fungi;p__Ascomycota;c__Leotiomycetes;o__Helotiales;f__Vibrissaceae;g__Phialocephala;s__Phialocephala_fortinii                          |
| OTU_107 | k__Fungi;p__Ascomycota;c__Sordariomycetes;o__Hypocreales;f__Nectriaceae;g__Xenoacremonium;s__                                             |
| OTU_108 | k__Fungi;p__Ascomycota;c__Eurotiomycetes;o__Eurotiales;f__Trichocomaceae;g__Talaromyces;s__                                               |
| OTU_109 | k__Fungi;p__Ascomycota;c__Sordariomycetes;o__Glomerellales;f__Plectosphaerellaceae;g__Plectosphaerella;s__                                |
| OTU_110 | k__Fungi;p__Basidiomycota;c__Cystobasidiomycetes;o__Cystobasidiomycetes_ord_Incertae_sedis;f__Symmetrosporaceae;g__Symmetrospora;s__      |
| OTU_111 | k__Fungi;p__Ascomycota;c__Eurotiomycetes;o__Eurotiales;f__Trichocomaceae;g__Talaromyces;s__                                               |
| OTU_112 | k__Fungi;p__Ascomycota;c__Eurotiomycetes;o__Eurotiales;f__Aspergillaceae;g__Penicillium;s__                                               |
| OTU_113 | k__Fungi;p__Ascomycota;c__Leotiomycetes;o__Rhytismatales;f__Cudoniaceae;g__Spathularia;s__                                                |
| OTU_114 | k__Fungi;p__Ascomycota;c__Saccharomycetes;o__Saccharomycetales;f__Dipodascaceae;g__Geotrichum;s__                                         |
| OTU_115 | k__Fungi;p__Ascomycota;c__Eurotiomycetes;o__Eurotiales;f__Aspergillaceae;g__s__                                                           |
| OTU_116 | k__Fungi;p__c__o__f__g__s__                                                                                                               |
| OTU_117 | k__Fungi;p__Ascomycota;c__Eurotiomycetes;o__Eurotiales;f__Aspergillaceae;g__Aspergillus;s__                                               |
| OTU_118 | k__Fungi;p__Mucoromycota;c__Mucoromycetes;o__Mucorales;f__Mucoraceae;g__Apophysomyces;s__                                                 |
| OTU_119 | k__Fungi;p__c__o__f__g__s__                                                                                                               |
| OTU_120 | k__Fungi;p__c__o__f__g__s__                                                                                                               |
| OTU_121 | k__Fungi;p__c__o__f__g__s__                                                                                                               |
| OTU_122 | k__Fungi;p__Ascomycota;c__Sordariomycetes;o__Hypocreales;f__Cordycipitaceae;g__Beauveria;s__Beauveria_felina                              |
| OTU_123 | k__Fungi;p__c__o__f__g__s__                                                                                                               |
| OTU_124 | k__Fungi;p__Basidiomycota;c__Tremellomycetes;o__Tremellales;f__g__s__                                                                     |
| OTU_125 | k__Fungi;p__c__o__f__g__s__                                                                                                               |

---

|         |                                                                                                                                           |
|---------|-------------------------------------------------------------------------------------------------------------------------------------------|
| OTU_126 | k__Fungi;p__c__;o__f__;g__s__                                                                                                             |
| OTU_127 | k__Fungi;p__Basidiomycota;c__Tremellomycetes;o__Filobasidiales;f__Filobasidiaceae;g__Naganishia;s__                                       |
| OTU_128 | k__Fungi;p__c__;o__f__;g__s__                                                                                                             |
| OTU_129 | k__Fungi;p__c__;o__f__;g__s__                                                                                                             |
| OTU_130 | k__Fungi;p__c__;o__f__;g__s__                                                                                                             |
| OTU_131 | k__Fungi;p__c__;o__f__;g__s__                                                                                                             |
| OTU_132 | k__Fungi;p__c__;o__f__;g__s__                                                                                                             |
| OTU_133 | k__Fungi;p__c__;o__f__;g__s__                                                                                                             |
| OTU_134 | k__Fungi;p__Basidiomycota;c__Tremellomycetes;o__Tremellales;f__Rhynchogastremataceae;g__Papiliotrema;s__                                  |
| OTU_135 | k__Fungi;p__Ascomycota;c__Eurotiomycetes;o__Eurotiales;f__Trichocomaceae;g__Talaromyces;s__                                               |
| OTU_136 | k__Fungi;p__Ascomycota;c__Saccharomycetes;o__Saccharomycetales;f__Dipodascaceae;g__Geotrichum;s__                                         |
| OTU_137 | k__Fungi;p__Ascomycota;c__Sordariomycetes;o__Hypocreales;f__;g__s__                                                                       |
| OTU_138 | k__Fungi;p__c__;o__f__;g__s__                                                                                                             |
| OTU_139 | k__Fungi;p__Ascomycota;c__Saccharomycetes;o__Saccharomycetales;f__Metschnikowiaceae;g__Kodamaea;s__Kodamaea_ohmeri                        |
| OTU_140 | k__Fungi;p__Ascomycota;c__Sordariomycetes;o__Hypocreales;f__Nectriaceae;g__Fusarium;s__                                                   |
| OTU_141 | k__Fungi;p__Ascomycota;c__Eurotiomycetes;o__Chaetothyriales;f__Cyphellophoraceae;g__Cyphellophora;s__Cyphellophora_oxyspora               |
| OTU_142 | k__Fungi;p__Ascomycota;c__Eurotiomycetes;o__Eurotiales;f__Aspergillaceae;g__Penicillium;s__                                               |
| OTU_143 | k__Fungi;p__Ascomycota;c__Saccharomycetes;o__Saccharomycetales;f__Dipodascaceae;g__;s__                                                   |
| OTU_144 | No blast hit                                                                                                                              |
| OTU_145 | k__Fungi;p__Ascomycota;c__Sordariomycetes;o__Hypocreales;f__Hypocreaceae;g__Trichoderma;s__Trichoderma_atroviride                         |
| OTU_146 | k__Fungi;p__c__;o__f__;g__s__                                                                                                             |
| OTU_147 | k__Fungi;p__Ascomycota;c__Eurotiomycetes;o__Eurotiales;f__Aspergillaceae;g__;s__                                                          |
| OTU_148 | k__Fungi;p__Ascomycota;c__Eurotiomycetes;o__Eurotiales;f__Aspergillaceae;g__Penicillium;s__                                               |
| OTU_149 | k__Fungi;p__Ascomycota;c__;o__f__;g__s__                                                                                                  |
| OTU_150 | k__Fungi;p__Ascomycota;c__Saccharomycetes;o__Saccharomycetales;f__Dipodascaceae;g__Geotrichum;s__                                         |
| OTU_151 | k__Fungi;p__c__;o__f__;g__s__                                                                                                             |
| OTU_152 | k__Fungi;p__c__;o__f__;g__s__                                                                                                             |
| OTU_153 | k__Fungi;p__Basidiomycota;c__Geminibasidiomycetes;o__Geminibasidiales;f__Geminibasidiaceae;g__Geminibasidium;s__                          |
| OTU_154 | k__Fungi;p__c__;o__f__;g__s__                                                                                                             |
| OTU_155 | k__Fungi;p__Ascomycota;c__Eurotiomycetes;o__Eurotiales;f__Trichocomaceae;g__Xerochrysium;s__Xerochrysium_dermatitidis                     |
| OTU_156 | k__Fungi;p__c__;o__f__;g__s__                                                                                                             |
| OTU_157 | k__Fungi;p__c__;o__f__;g__s__                                                                                                             |
| OTU_158 | k__Fungi;p__c__;o__f__;g__s__                                                                                                             |
| OTU_159 | k__Fungi;p__c__;o__f__;g__s__                                                                                                             |
| OTU_160 | k__Fungi;p__Ascomycota;c__Saccharomycetes;o__Saccharomycetales;f__Saccharomycetales_fam_Incertae_sedis;g__Candida;s__                     |
| OTU_161 | k__Fungi;p__c__;o__f__;g__s__                                                                                                             |
| OTU_162 | k__Fungi;p__c__;o__f__;g__s__                                                                                                             |
| OTU_163 | k__Fungi;p__Ascomycota;c__Eurotiomycetes;o__Chaetothyriales;f__Cyphellophoraceae;g__Cyphellophora;s__                                     |
| OTU_164 | k__Fungi;p__c__;o__f__;g__s__                                                                                                             |
| OTU_165 | k__Fungi;p__c__;o__f__;g__s__                                                                                                             |
| OTU_166 | k__Fungi;p__c__;o__f__;g__s__                                                                                                             |
| OTU_167 | k__Fungi;p__Ascomycota;c__Leotiomyces;o__Helotiales;f__;g__s__                                                                            |
| OTU_168 | k__Fungi;p__c__;o__f__;g__s__                                                                                                             |
| OTU_169 | k__Fungi;p__Basidiomycota;c__Agaricomycetes;o__Russulales;f__Russulaceae;g__Russula;s__                                                   |
| OTU_170 | k__Fungi;p__c__;o__f__;g__s__                                                                                                             |
| OTU_171 | k__Fungi;p__Ascomycota;c__Saccharomycetes;o__Saccharomycetales;f__Saccharomycetales_fam_Incertae_sedis;g__Candida;s__Candida_parapsilosis |
| OTU_172 | k__Fungi;p__Basidiomycota;c__Tremellomycetes;o__Tremellales;f__Rhynchogastremataceae;g__Papiliotrema;s__                                  |
| OTU_173 | k__Fungi;p__Ascomycota;c__Eurotiomycetes;o__Eurotiales;f__Trichocomaceae;g__Talaromyces;s__                                               |
| OTU_174 | k__Fungi;p__Basidiomycota;c__Tremellomycetes;o__Tremellales;f__;g__s__                                                                    |
| OTU_175 | k__Fungi;p__Basidiomycota;c__Tremellomycetes;o__Tremellales;f__Rhynchogastremataceae;g__Papiliotrema;s__                                  |

---

---

|         |                                                                                                                                              |
|---------|----------------------------------------------------------------------------------------------------------------------------------------------|
| OTU_176 | k__Fungi;p__Ascomycota;c__Eurotiomycetes;o__Eurotiales;f__Aspergillaceae;g__Penicillium;s__                                                  |
| OTU_177 | k__Fungi;p__c__;o__f__;g__;s__                                                                                                               |
| OTU_178 | k__Fungi;p__Ascomycota;c__Saccharomycetes;o__Saccharomycetales;f__Saccharomycetales_fam_Incertae_sedis;g__Candida;s__                        |
| OTU_179 | k__Fungi;p__c__;o__f__;g__;s__                                                                                                               |
| OTU_180 | No blast hit                                                                                                                                 |
| OTU_181 | k__Fungi;p__c__;o__f__;g__;s__                                                                                                               |
| OTU_182 | k__Fungi;p__c__;o__f__;g__;s__                                                                                                               |
| OTU_183 | k__Fungi;p__c__;o__f__;g__;s__                                                                                                               |
| OTU_184 | k__Fungi;p__c__;o__f__;g__;s__                                                                                                               |
| OTU_185 | k__Fungi;p__c__;o__f__;g__;s__                                                                                                               |
| OTU_186 | k__Fungi;p__c__;o__f__;g__;s__                                                                                                               |
| OTU_187 | k__Fungi;p__Ascomycota;c__Saccharomycetes;o__Saccharomycetales;f__Trichomonascaceae;g__Zygoascus;s__                                         |
| OTU_188 | k__Fungi;p__Basidiomycota;c__Tremellomycetes;o__Tremellales;f__Cuniculitremaeae;g__Fellomyces;s__                                            |
| OTU_189 | k__Fungi;p__Mucoromycota;c__Umbelopsidomycetes;o__Umbelopsidales;f__Umbelopsidaceae;g__Umbelopsis;s__                                        |
| OTU_190 | k__Fungi;p__c__;o__f__;g__;s__                                                                                                               |
| OTU_191 | k__Fungi;p__Ascomycota;c__Saccharomycetes;o__Saccharomycetales;f__Saccharomycetales_fam_Incertae_sedis;g__Candida;s__                        |
| OTU_192 | k__Fungi;p__Ascomycota;c__Sordariomycetes;o__Xylariales;f__Xylariaceae;g__Hypoxylon;s__                                                      |
| OTU_193 | k__Fungi;p__Ascomycota;c__Sordariomycetes;o__Microascales;f__Microascaceae;g__Microascus;s__                                                 |
| OTU_194 | k__Fungi;p__c__;o__f__;g__;s__                                                                                                               |
| OTU_195 | k__Fungi;p__Ascomycota;c__Saccharomycetes;o__Saccharomycetales;f__Debaryomycetaceae;g__Meyerozyma;s__                                        |
| OTU_196 | k__Fungi;p__Ascomycota;c__Saccharomycetes;o__Saccharomycetales;f__Phaffomycetaceae;g__Barnettozyma;s__Barnettozyma_californica               |
| OTU_197 | k__Fungi;p__Ascomycota;c__Saccharomycetes;o__Saccharomycetales;f__Saccharomycetales_fam_Incertae_sedis;g__Candida;s__                        |
| OTU_198 | k__Fungi;p__Ascomycota;c__Saccharomycetes;o__Saccharomycetales;f__Dipodascaceae;g__Dipodascus;s__                                            |
| OTU_199 | k__Fungi;p__Ascomycota;c__Sordariomycetes;o__Hypocreales;f__Nectriaceae;g__Sarcopodium;s__                                                   |
| OTU_200 | k__Fungi;p__Ascomycota;c__Eurotiomycetes;o__Eurotiales;f__Aspergillaceae;g__Penicillium;s__                                                  |
| OTU_201 | k__Fungi;p__Ascomycota;c__Eurotiomycetes;o__Chaetothyriales;f__Herpotrichiellaceae;g__Exophiala;s__Exophiala_oligosperma                     |
| OTU_202 | k__Fungi;p__Ascomycota;c__Eurotiomycetes;o__Eurotiales;f__Aspergillaceae;g__Penicillium;s__                                                  |
| OTU_203 | k__Fungi;p__c__;o__f__;g__;s__                                                                                                               |
| OTU_204 | k__Fungi;p__c__;o__f__;g__;s__                                                                                                               |
| OTU_205 | k__Fungi;p__c__;o__f__;g__;s__                                                                                                               |
| OTU_206 | k__Fungi;p__Basidiomycota;c__Cystobasidiomycetes;o__f__;g__;s__                                                                              |
| OTU_207 | k__Fungi;p__c__;o__f__;g__;s__                                                                                                               |
| OTU_208 | k__Fungi;p__Ascomycota;c__Eurotiomycetes;o__Eurotiales;f__Aspergillaceae;g__Aspergillus;s__                                                  |
| OTU_209 | k__Fungi;p__Ascomycota;c__Dothideomycetes;o__Capnodiales;f__Cladosporiaceae;g__Cladosporium;s__                                              |
| OTU_210 | k__Fungi;p__c__;o__f__;g__;s__                                                                                                               |
| OTU_211 | k__Fungi;p__Ascomycota;c__Saccharomycetes;o__Saccharomycetales;f__Dipodascaceae;g__Dipodascus;s__                                            |
| OTU_212 | k__Fungi;p__Ascomycota;c__o__f__;g__;s__                                                                                                     |
| OTU_213 | k__Fungi;p__c__;o__f__;g__;s__                                                                                                               |
| OTU_214 | k__Fungi;p__c__;o__f__;g__;s__                                                                                                               |
| OTU_215 | k__Fungi;p__c__;o__f__;g__;s__                                                                                                               |
| OTU_216 | k__Fungi;p__Ascomycota;c__Leotiomyces;o__Helotiales;f__;g__;s__                                                                              |
| OTU_217 | k__Fungi;p__Basidiomycota;c__Tremellomycetes;o__Tremellales;f__Rhynchogastremataceae;g__Papiliotrema;s__                                     |
| OTU_218 | k__Fungi;p__Ascomycota;c__Eurotiomycetes;o__Eurotiales;f__Aspergillaceae;g__Penicillium;s__                                                  |
| OTU_219 | k__Fungi;p__c__;o__f__;g__;s__                                                                                                               |
| OTU_220 | k__Fungi;p__Basidiomycota;c__Agaricomycetes;o__Agaricales;f__Schizophyllaceae;g__Schizophyllum;s__Schizophyllum_comune                       |
| OTU_221 | k__Fungi;p__c__;o__f__;g__;s__                                                                                                               |
| OTU_222 | k__Fungi;p__c__;o__f__;g__;s__                                                                                                               |
| OTU_223 | k__Fungi;p__Basidiomycota;c__Microbotryomycetes;o__Sporidiobolales;f__Sporidiobolaceae;g__Rhodosporidiobolus;s__Rhodosporidiobolus_ruineniae |
| OTU_224 | k__Fungi;p__c__;o__f__;g__;s__                                                                                                               |
| OTU_225 | k__Fungi;p__c__;o__f__;g__;s__                                                                                                               |

---

---

|         |                                                                                                                                   |
|---------|-----------------------------------------------------------------------------------------------------------------------------------|
| OTU_226 | k__Fungi;p__Ascomycota;c__Dothideomycetes;o__f__g__s__                                                                            |
| OTU_227 | k__Fungi;p__c__o__f__g__s__                                                                                                       |
| OTU_228 | k__Fungi;p__c__o__f__g__s__                                                                                                       |
| OTU_229 | k__Fungi;p__Ascomycota;c__Dothideomycetes;o__Pleosporales;f__Phaeosphaeriaceae;g__Ophiosphaerella;s__                             |
| OTU_230 | k__Fungi;p__c__o__f__g__s__                                                                                                       |
| OTU_231 | k__Fungi;p__Ascomycota;c__Dothideomycetes;o__Capnodiales;f__Mycosphaerellaceae;g__Pallidocercospora;s__                           |
| OTU_232 | k__Fungi;p__c__o__f__g__s__                                                                                                       |
| OTU_233 | k__Fungi;p__Ascomycota;c__Eurotiomycetes;o__Eurotiales;f__Aspergillaceae;g__Penicillium;s__                                       |
| OTU_234 | k__Fungi;p__c__o__f__g__s__                                                                                                       |
| OTU_235 | k__Fungi;p__c__o__f__g__s__                                                                                                       |
| OTU_236 | k__Fungi;p__Ascomycota;c__Eurotiomycetes;o__Eurotiales;f__Aspergillaceae;g__Penicillium;s__                                       |
| OTU_237 | k__Fungi;p__Basidiomycota;c__Tremellomycetes;o__Tremellales;f__Bulleribasidiaceae;g__Hannaella;s__                                |
| OTU_238 | k__Fungi;p__Ascomycota;c__Saccharomycetes;o__Saccharomycetales;f__Dipodascaceae;g__Dipodascus;s__                                 |
| OTU_239 | k__Fungi;p__c__o__f__g__s__                                                                                                       |
| OTU_240 | k__Fungi;p__Ascomycota;c__Saccharomycetes;o__Saccharomycetales;f__Debaryomycetaceae;g__Meyerozyma;s__                             |
| OTU_241 | k__Fungi;p__Ascomycota;c__Dothideomycetes;o__Botryosphaeriales;f__Botryosphaeriaceae;g__Lasiodiplodia;s__                         |
| OTU_242 | k__Fungi;p__c__o__f__g__s__                                                                                                       |
| OTU_243 | k__Fungi;p__Ascomycota;c__Sordariomycetes;o__Ophiostomatales;f__Ophiostomataceae;g__Sporothrix;s__                                |
| OTU_244 | k__Fungi;p__Basidiomycota;c__Exobasidiomycetes;o__Exobasidiales;f__Brachybasidiaceae;g__Meira;s__                                 |
| OTU_245 | k__Fungi;p__c__o__f__g__s__                                                                                                       |
| OTU_246 | k__Fungi;p__c__o__f__g__s__                                                                                                       |
| OTU_247 | k__Fungi;p__Ascomycota;c__Eurotiomycetes;o__Chaetothyriales;f__Herpotrichiellaceae;g__Cladophialophora;s__Cladophialophora_boppii |
| OTU_248 | k__Fungi;p__Ascomycota;c__Eurotiomycetes;o__Eurotiales;f__Aspergillaceae;g__Penicillium;s__                                       |
| OTU_249 | k__Fungi;p__Ascomycota;c__Sordariomycetes;o__Xylariales;f__g__s__                                                                 |
| OTU_250 | k__Fungi;p__Ascomycota;c__Lecanoromycetes;o__Lecanorales;f__Stereocaulaceae;g__Lepraria;s__                                       |
| OTU_251 | k__Fungi;p__Basidiomycota;c__Tremellomycetes;o__Tremellales;f__Rhynchogastremataceae;g__Papiliotrema;s__                          |
| OTU_252 | k__Fungi;p__Basidiomycota;c__Tremellomycetes;o__Trichosporonales;f__Trichosporonaceae;g__Trichosporon;s__                         |
| OTU_253 | k__Fungi;p__c__o__f__g__s__                                                                                                       |
| OTU_254 | k__Fungi;p__c__o__f__g__s__                                                                                                       |
| OTU_255 | k__Fungi;p__Ascomycota;c__Sordariomycetes;o__Sordariales;f__Chaetomiaceae;g__Humicola;s__                                         |
| OTU_256 | k__Fungi;p__c__o__f__g__s__                                                                                                       |
| OTU_257 | k__Fungi;p__Ascomycota;c__Saccharomycetes;o__Saccharomycetales;f__Metschnikowiaceae;g__Kodamaea;s__Kodamaea_ohmeri                |
| OTU_258 | k__Fungi;p__c__o__f__g__s__                                                                                                       |
| OTU_259 | k__Fungi;p__Ascomycota;c__Eurotiomycetes;o__Eurotiales;f__Trichocomaceae;g__Talaromyces;s__                                       |
| OTU_260 | k__Fungi;p__c__o__f__g__s__                                                                                                       |
| OTU_261 | k__Fungi;p__Ascomycota;c__o__f__g__s__                                                                                            |
| OTU_262 | k__Fungi;p__c__o__f__g__s__                                                                                                       |
| OTU_263 | k__Fungi;p__Basidiomycota;c__Agaricomycetes;o__Agaricales;f__Amanitaceae;g__Amanita;s__                                           |
| OTU_264 | k__Fungi;p__Ascomycota;c__Sordariomycetes;o__Diaporthales;f__g__s__                                                               |
| OTU_265 | k__Fungi;p__Ascomycota;c__Eurotiomycetes;o__Eurotiales;f__Trichocomaceae;g__Talaromyces;s__                                       |
| OTU_266 | k__Fungi;p__Ascomycota;c__Saccharomycetes;o__Saccharomycetales;f__Debaryomycetaceae;g__Meyerozyma;s__                             |
| OTU_267 | k__Fungi;p__Rozellomycota;c__o__f__g__s__                                                                                         |
| OTU_268 | k__Fungi;p__Ascomycota;c__Leotiomycetes;o__Helotiales;f__Helotiales_fam_Incertae_sedis;g__Leptodontidium;s__                      |
| OTU_269 | k__Fungi;p__Ascomycota;c__Eurotiomycetes;o__Eurotiales;f__Aspergillaceae;g__Aspergillus;s__                                       |
| OTU_270 | k__Fungi;p__c__o__f__g__s__                                                                                                       |
| OTU_271 | k__Fungi;p__Ascomycota;c__Saccharomycetes;o__Saccharomycetales;f__g__s__                                                          |
| OTU_272 | k__Fungi;p__Ascomycota;c__Pezizomycetes;o__Pezizales;f__Pyronemataceae;g__Tricharina;s__                                          |
| OTU_273 | k__Fungi;p__Basidiomycota;c__Tremellomycetes;o__Tremellales;f__Bulleribasidiaceae;g__Hannaella;s__                                |
| OTU_274 | k__Fungi;p__Ascomycota;c__Saccharomycetes;o__Saccharomycetales;f__Dipodascaceae;g__s__                                            |
| OTU_275 | k__Fungi;p__Ascomycota;c__Sordariomycetes;o__Xylariales;f__g__s__                                                                 |
| OTU_276 | k__Fungi;p__c__o__f__g__s__                                                                                                       |
| OTU_277 | k__Fungi;p__c__o__f__g__s__                                                                                                       |
| OTU_278 | k__Fungi;p__c__o__f__g__s__                                                                                                       |
| OTU_279 | k__Fungi;p__c__o__f__g__s__                                                                                                       |
| OTU_280 | k__Fungi;p__Basidiomycota;c__Agaricomycetes;o__Boletales;f__Suillaceae;g__Suillus;s__Suillus_placidus                             |

---

---

|         |                                                                                                                                          |
|---------|------------------------------------------------------------------------------------------------------------------------------------------|
| OTU_281 | k__Fungi;p__Basidiomycota;c__Microbotryomycetes;o__Sporidiobolales;f__Sporidiobolaceae;g__Rhodotorula;s__                                |
| OTU_282 | k__Fungi;p__Ascomycota;c__Saccharomycetes;o__Saccharomycetales;f__Pichiaceae;g__Pichia;s__                                               |
| OTU_283 | k__Fungi;p__Basidiomycota;c__Agaricomycetes;o__Cantharellales;f__Hydnaceae;g__;s__                                                       |
| OTU_284 | k__Fungi;p__Ascomycota;c__Dothideomycetes;o__Pleosporales;f__Pleosporales_fam_Incertae_sedis;g__Trichobotrys;s__                         |
| OTU_285 | k__Fungi;p__Ascomycota;c__Sordariomycetes;o__Microascales;f__;g__;s__                                                                    |
| OTU_286 | k__Fungi;p__;c__;o__;f__;g__;s__                                                                                                         |
| OTU_287 | k__Fungi;p__Basidiomycota;c__Tremellomycetes;o__Tremellales;f__Trimorphomycetaceae;g__Saitozyma;s__Saitozyma_podzolica                   |
| OTU_288 | k__Fungi;p__;c__;o__;f__;g__;s__                                                                                                         |
| OTU_289 | k__Fungi;p__Ascomycota;c__Saccharomycetes;o__Saccharomycetales;f__Saccharomycetales_fam_Incertae_sedis;g__Candida;s__Candida_quercitrusa |
| OTU_290 | k__Fungi;p__;c__;o__;f__;g__;s__                                                                                                         |
| OTU_291 | k__Fungi;p__Ascomycota;c__Eurotiomycetes;o__Chaetothyriales;f__Cyphellophoraceae;g__Cyphellophora;s__                                    |
| OTU_292 | k__Fungi;p__Basidiomycota;c__Agaricomycetes;o__Polyporales;f__Coriolaceae;g__Trametes;s__                                                |
| OTU_293 | k__Fungi;p__Ascomycota;c__Saccharomycetes;o__Saccharomycetales;f__Saccharomycetales_fam_Incertae_sedis;g__Candida;s__                    |
| OTU_294 | k__Fungi;p__;c__;o__;f__;g__;s__                                                                                                         |
| OTU_295 | k__Fungi;p__;c__;o__;f__;g__;s__                                                                                                         |
| OTU_296 | k__Fungi;p__Ascomycota;c__Saccharomycetes;o__Saccharomycetales;f__Dipodascaceae;g__Dipodascus;s__                                        |
| OTU_297 | k__Fungi;p__Ascomycota;c__Eurotiomycetes;o__Eurotiales;f__Trichocomaceae;g__Talaromyces;s__                                              |
| OTU_298 | k__Fungi;p__;c__;o__;f__;g__;s__                                                                                                         |
| OTU_299 | k__Fungi;p__;c__;o__;f__;g__;s__                                                                                                         |
| OTU_300 | k__Fungi;p__;c__;o__;f__;g__;s__                                                                                                         |
| OTU_301 | k__Fungi;p__Ascomycota;c__Sordariomycetes;o__Glomerellales;f__Plectosphaerellaceae;g__Gibellulopsis;s__                                  |
| OTU_302 | k__Fungi;p__Ascomycota;c__Eurotiomycetes;o__Eurotiales;f__Aspergillaceae;g__Penicillium;s__                                              |
| OTU_303 | k__Fungi;p__Ascomycota;c__Eurotiomycetes;o__Eurotiales;f__Aspergillaceae;g__Penicillium;s__                                              |
| OTU_304 | k__Fungi;p__Ascomycota;c__Dothideomycetes;o__Pleosporales;f__;g__;s__                                                                    |
| OTU_305 | k__Fungi;p__;c__;o__;f__;g__;s__                                                                                                         |
| OTU_306 | k__Fungi;p__;c__;o__;f__;g__;s__                                                                                                         |
| OTU_307 | k__Fungi;p__;c__;o__;f__;g__;s__                                                                                                         |
| OTU_308 | k__Fungi;p__Ascomycota;c__Dothideomycetes;o__Pleosporales;f__Pleosporaceae;g__Bipolaris;s__                                              |
| OTU_309 | No blast hit                                                                                                                             |
| OTU_310 | k__Fungi;p__;c__;o__;f__;g__;s__                                                                                                         |
| OTU_311 | k__Fungi;p__;c__;o__;f__;g__;s__                                                                                                         |
| OTU_312 | k__Fungi;p__;c__;o__;f__;g__;s__                                                                                                         |
| OTU_313 | k__Fungi;p__;c__;o__;f__;g__;s__                                                                                                         |
| OTU_314 | k__Fungi;p__Ascomycota;c__Saccharomycetes;o__Saccharomycetales;f__Phaffomycetaceae;g__Cyberlindnera;s__                                  |
| OTU_315 | k__Fungi;p__Ascomycota;c__Sordariomycetes;o__Xylariales;f__Bartaliniaceae;g__Bartalinia;s__                                              |
| OTU_316 | k__Fungi;p__Ascomycota;c__Dothideomycetes;o__Pleosporales;f__;g__;s__                                                                    |
| OTU_317 | k__Fungi;p__Basidiomycota;c__Tremellomycetes;o__Tremellales;f__Rhynchogastremataceae;g__Papiliotrema;s__                                 |
| OTU_318 | k__Fungi;p__;c__;o__;f__;g__;s__                                                                                                         |
| OTU_319 | k__Fungi;p__Glomeromycota;c__Glomeromycetes;o__Glomerales;f__Glomeraceae;g__Dominikia;s__                                                |
| OTU_320 | k__Fungi;p__;c__;o__;f__;g__;s__                                                                                                         |
| OTU_321 | k__Fungi;p__Ascomycota;c__Saccharomycetes;o__Saccharomycetales;f__Metschnikowiaceae;g__Clavispora;s__                                    |
| OTU_322 | k__Fungi;p__Ascomycota;c__Saccharomycetes;o__Saccharomycetales;f__Debaryomycetaceae;g__Meyerozyma;s__                                    |
| OTU_323 | k__Fungi;p__Ascomycota;c__Pezizomycetes;o__Pezizales;f__Pezizaceae;g__;s__                                                               |
| OTU_324 | k__Fungi;p__;c__;o__;f__;g__;s__                                                                                                         |
| OTU_325 | k__Fungi;p__Ascomycota;c__Saccharomycetes;o__Saccharomycetales;f__Dipodascaceae;g__Dipodascus;s__                                        |
| OTU_326 | k__Fungi;p__Ascomycota;c__Eurotiomycetes;o__Eurotiales;f__Aspergillaceae;g__Penicillium;s__                                              |
| OTU_327 | k__Fungi;p__;c__;o__;f__;g__;s__                                                                                                         |
| OTU_328 | k__Fungi;p__Basidiomycota;c__Agaricomycetes;o__Cantharellales;f__Clavulinaceae;g__Clavulina;s__                                          |
| OTU_329 | k__Fungi;p__Ascomycota;c__Sordariomycetes;o__Hypocreales;f__Nectriaceae;g__Neonectria;s__                                                |
| OTU_330 | k__Fungi;p__Ascomycota;c__Saccharomycetes;o__Saccharomycetales;f__Dipodascaceae;g__;s__                                                  |
| OTU_331 | k__Fungi;p__Ascomycota;c__Sordariomycetes;o__Hypocreales;f__;g__;s__                                                                     |
| OTU_332 | k__Fungi;p__Ascomycota;c__Saccharomycetes;o__Saccharomycetales;f__Dipodascaceae;g__Dipodascus;s__                                        |
| OTU_333 | k__Fungi;p__;c__;o__;f__;g__;s__                                                                                                         |

---

---

|         |                                                                                                                       |
|---------|-----------------------------------------------------------------------------------------------------------------------|
| OTU_334 | k__Fungi;p__c__o__f__g__s__                                                                                           |
| OTU_335 | k__Fungi;p__Ascomycota;c__Saccharomycetes;o__Saccharomycetales;f__Dipodascaceae;g__Dipodascus;s__                     |
| OTU_336 | k__Fungi;p__c__o__f__g__s__                                                                                           |
| OTU_337 | k__Fungi;p__Ascomycota;c__Saccharomycetes;o__Saccharomycetales;f__Dipodascaceae;g__Dipodascus;s__                     |
| OTU_338 | k__Fungi;p__c__o__f__g__s__                                                                                           |
| OTU_339 | k__Fungi;p__c__o__f__g__s__                                                                                           |
| OTU_340 | k__Fungi;p__Basidiomycota;c__Tremellomycetes;o__Tremellales;f__Rhynchogastremataceae;g__Papiliotrema;s__              |
| OTU_341 | k__Fungi;p__c__o__f__g__s__                                                                                           |
| OTU_342 | k__Fungi;p__Ascomycota;c__Archaeorhizomycetes;o__f__g__s__                                                            |
| OTU_343 | k__Fungi;p__c__o__f__g__s__                                                                                           |
| OTU_344 | k__Fungi;p__c__o__f__g__s__                                                                                           |
| OTU_345 | k__Fungi;p__Ascomycota;c__o__f__g__s__                                                                                |
| OTU_346 | k__Fungi;p__Ascomycota;c__Dothideomycetes;o__Capnodiales;f__Cladosporiaceae;g__s__                                    |
| OTU_347 | k__Fungi;p__Ascomycota;c__Sordariomycetes;o__Hypocreales;f__Nectriaceae;g__Fusarium;s__                               |
| OTU_348 | k__Fungi;p__Ascomycota;c__o__f__g__s__                                                                                |
| OTU_349 | No blast hit                                                                                                          |
| OTU_350 | k__Fungi;p__Basidiomycota;c__Tremellomycetes;o__Tremellales;f__Rhynchogastremataceae;g__Papiliotrema;s__              |
| OTU_351 | k__Fungi;p__c__o__f__g__s__                                                                                           |
| OTU_352 | k__Fungi;p__Ascomycota;c__Saccharomycetes;o__Saccharomycetales;f__Dipodascaceae;g__Dipodascus;s__                     |
| OTU_353 | k__Fungi;p__c__o__f__g__s__                                                                                           |
| OTU_354 | k__Fungi;p__Basidiomycota;c__Tremellomycetes;o__Tremellales;f__Trimorphomycetaceae;g__s__                             |
| OTU_355 | k__Fungi;p__c__o__f__g__s__                                                                                           |
| OTU_356 | k__Fungi;p__Ascomycota;c__Eurotiomycetes;o__Eurotiales;f__Aspergillaceae;g__Penicillium;s__                           |
| OTU_357 | k__Fungi;p__c__o__f__g__s__                                                                                           |
| OTU_358 | k__Fungi;p__Ascomycota;c__Saccharomycetes;o__Saccharomycetales;f__Metschnikowiaceae;g__Metschnikowia;s__              |
| OTU_359 | k__Fungi;p__Ascomycota;c__Eurotiomycetes;o__Eurotiales;f__Aspergillaceae;g__Penicillium;s__                           |
| OTU_360 | k__Fungi;p__c__o__f__g__s__                                                                                           |
| OTU_361 | k__Fungi;p__Ascomycota;c__Sordariomycetes;o__Sordariales;f__Lasiosphaeriaceae;g__Fimetariella;s__                     |
| OTU_362 | k__Fungi;p__c__o__f__g__s__                                                                                           |
| OTU_363 | k__Fungi;p__c__o__f__g__s__                                                                                           |
| OTU_364 | k__Fungi;p__c__o__f__g__s__                                                                                           |
| OTU_365 | k__Fungi;p__Chytridiomycota;c__Rhizophydiomycetes;o__Rhizophydiales;f__Terramycetaceae;g__Boothiomycetes;s__          |
| OTU_366 | -<br>k__Fungi;p__c__o__f__g__s__                                                                                      |
| OTU_367 | k__Fungi;p__Ascomycota;c__Eurotiomycetes;o__Eurotiales;f__Aspergillaceae;g__Penicillium;s__                           |
| OTU_368 | k__Fungi;p__c__o__f__g__s__                                                                                           |
| OTU_369 | k__Fungi;p__Ascomycota;c__Dothideomycetes;o__Capnodiales;f__Cladosporiaceae;g__s__                                    |
| OTU_370 | k__Fungi;p__Ascomycota;c__Eurotiomycetes;o__Eurotiales;f__Aspergillaceae;g__Penicillium;s__                           |
| OTU_371 | k__Fungi;p__c__o__f__g__s__                                                                                           |
| OTU_372 | k__Fungi;p__c__o__f__g__s__                                                                                           |
| OTU_373 | k__Fungi;p__c__o__f__g__s__                                                                                           |
| OTU_374 | k__Fungi;p__c__o__f__g__s__                                                                                           |
| OTU_375 | k__Fungi;p__c__o__f__g__s__                                                                                           |
| OTU_376 | k__Fungi;p__Ascomycota;c__Eurotiomycetes;o__Chaetothyriales;f__Herpotrichiellaceae;g__Exophiala;s__                   |
| OTU_377 | k__Fungi;p__Basidiomycota;c__Agaricomycetes;o__Agaricales;f__Agaricales_fam_Incertae_sedis;g__Digitatispora;s__       |
| OTU_378 | -<br>k__Fungi;p__c__o__f__g__s__                                                                                      |
| OTU_379 | k__Fungi;p__c__o__f__g__s__                                                                                           |
| OTU_380 | k__Fungi;p__Ascomycota;c__Eurotiomycetes;o__Eurotiales;f__Aspergillaceae;g__Aspergillus;s__                           |
| OTU_381 | k__Fungi;p__Ascomycota;c__Saccharomycetes;o__Saccharomycetales;f__Pichiaceae;g__Pichia;s__Pichia_klvyveri             |
| OTU_382 | k__Fungi;p__Ascomycota;c__Dothideomycetes;o__Pleosporales;f__Didymosphaeriaceae;g__Montagnula;s__                     |
| OTU_383 | k__Fungi;p__Basidiomycota;c__Tremellomycetes;o__Tremellales;f__Cuniculitremaeae;g__Fellomyces;s__                     |
| OTU_384 | k__Fungi;p__c__o__f__g__s__                                                                                           |
| OTU_385 | k__Fungi;p__Ascomycota;c__Saccharomycetes;o__Saccharomycetales;f__Saccharomycetales_fam_Incertae_sedis;g__Candida;s__ |
| OTU_386 | k__Fungi;p__Ascomycota;c__Saccharomycetes;o__Saccharomycetales;f__Debaryomycetaceae;g__Meyerozyma;s__                 |
| OTU_387 | k__Fungi;p__Basidiomycota;c__Agaricomycetes;o__Atheliales;f__Atheliaceae;g__Piloderma;s__                             |

---



---

|         |                                                                                                                       |
|---------|-----------------------------------------------------------------------------------------------------------------------|
| OTU_388 | k__Fungi;p__Basidiomycota;c__Cystobasidiomycetes;o__Cystobasidiales;f__Cystobasidiaceae;g__Cystobasidium;s__          |
| OTU_389 | k__Fungi;p__c__;o__f__;g__;s__                                                                                        |
| OTU_390 | k__Fungi;p__Basidiomycota;c__Tremellomycetes;o__Tremellales;f__Rhynchogastremataceae;g__Papiliotrema;s__              |
| OTU_391 | k__Fungi;p__c__;o__f__;g__;s__                                                                                        |
| OTU_392 | k__Fungi;p__Ascomycota;c__Sordariomycetes;o__Hypocreales;f__Cordycipitaceae;g__Beauveria;s__                          |
| OTU_393 | k__Fungi;p__Glomeromycota;c__Glomeromycetes;o__Glomerales;f__Glomeraceae;g__;s__                                      |
| OTU_394 | k__Fungi;p__c__;o__f__;g__;s__                                                                                        |
| OTU_395 | k__Fungi;p__c__;o__f__;g__;s__                                                                                        |
| OTU_396 | k__Fungi;p__c__;o__f__;g__;s__                                                                                        |
| OTU_397 | k__Fungi;p__Basidiomycota;c__Tremellomycetes;o__Tremellales;f__Rhynchogastremataceae;g__Papiliotrema;s__              |
| OTU_398 | k__Fungi;p__Ascomycota;c__Eurotiomycetes;o__Chaetothyriales;f__Cyphellophoraceae;g__Cyphellophora;s__                 |
| OTU_399 | k__Fungi;p__c__;o__f__;g__;s__                                                                                        |
| OTU_400 | k__Fungi;p__c__;o__f__;g__;s__                                                                                        |
| OTU_401 | k__Fungi;p__c__;o__f__;g__;s__                                                                                        |
| OTU_402 | k__Fungi;p__Basidiomycota;c__;o__f__;g__;s__                                                                          |
| OTU_403 | k__Fungi;p__Basidiomycota;c__Wallemiomycetes;o__Wallemiales;f__Wallemiaceae;g__Wallemia;s__                           |
| OTU_404 | k__Fungi;p__c__;o__f__;g__;s__                                                                                        |
| OTU_405 | k__Fungi;p__Basidiomycota;c__Agaricomycetes;o__Agaricales;f__Lyophyllaceae;g__Lyophyllum;s__                          |
| OTU_406 | k__Fungi;p__c__;o__f__;g__;s__                                                                                        |
| OTU_407 | k__Fungi;p__c__;o__f__;g__;s__                                                                                        |
| OTU_408 | k__Fungi;p__Ascomycota;c__Saccharomycetes;o__Saccharomycetales;f__Debaryomycetaceae;g__Meyerozyma;s__                 |
| OTU_409 | k__Fungi;p__c__;o__f__;g__;s__                                                                                        |
| OTU_410 | k__Fungi;p__c__;o__f__;g__;s__                                                                                        |
| OTU_411 | k__Fungi;p__c__;o__f__;g__;s__                                                                                        |
| OTU_412 | k__Fungi;p__c__;o__f__;g__;s__                                                                                        |
| OTU_413 | k__Fungi;p__Basidiomycota;c__Agaricomycetes;o__Cantharellales;f__Clavulinaceae;g__;s__                                |
| OTU_414 | k__Fungi;p__Ascomycota;c__Saccharomycetes;o__Saccharomycetales;f__Debaryomycetaceae;g__Meyerozyma;s__                 |
| OTU_415 | k__Fungi;p__c__;o__f__;g__;s__                                                                                        |
| OTU_416 | k__Fungi;p__c__;o__f__;g__;s__                                                                                        |
| OTU_417 | k__Fungi;p__c__;o__f__;g__;s__                                                                                        |
| OTU_418 | k__Fungi;p__Ascomycota;c__Eurotiomycetes;o__Eurotiales;f__Aspergillaceae;g__Penicillium;s__                           |
| OTU_419 | k__Fungi;p__c__;o__f__;g__;s__                                                                                        |
| OTU_420 | k__Fungi;p__c__;o__f__;g__;s__                                                                                        |
| OTU_421 | k__Fungi;p__c__;o__f__;g__;s__                                                                                        |
| OTU_422 | k__Fungi;p__Basidiomycota;c__Tremellomycetes;o__Tremellales;f__;g__;s__                                               |
| OTU_423 | k__Fungi;p__Ascomycota;c__Saccharomycetes;o__Saccharomycetales;f__Dipodascaceae;g__;s__                               |
| OTU_424 | k__Fungi;p__Ascomycota;c__Eurotiomycetes;o__Eurotiales;f__Trichocomaceae;g__Talaromyces;s__                           |
| OTU_425 | k__Fungi;p__Ascomycota;c__Eurotiomycetes;o__Eurotiales;f__Aspergillaceae;g__Penicillium;s__                           |
| OTU_426 | k__Fungi;p__c__;o__f__;g__;s__                                                                                        |
| OTU_427 | k__Fungi;p__Ascomycota;c__Dothideomycetes;o__Mytilinidales;f__Gloniaceae;g__Cenococcum;s__                            |
| OTU_428 | k__Fungi;p__c__;o__f__;g__;s__                                                                                        |
| OTU_429 | k__Fungi;p__c__;o__f__;g__;s__                                                                                        |
| OTU_430 | k__Fungi;p__Ascomycota;c__Saccharomycetes;o__Saccharomycetales;f__Saccharomycetales_fam_Incertae_sedis;g__Candida;s__ |
| OTU_431 | k__Fungi;p__Ascomycota;c__Dothideomycetes;o__Pleosporales;f__;g__;s__                                                 |
| OTU_432 | k__Fungi;p__Ascomycota;c__Eurotiomycetes;o__Eurotiales;f__Aspergillaceae;g__Penicillium;s__                           |
| OTU_433 | k__Fungi;p__Ascomycota;c__Eurotiomycetes;o__Eurotiales;f__Aspergillaceae;g__Penicillium;s__                           |
| OTU_434 | k__Fungi;p__Ascomycota;c__Saccharomycetes;o__Saccharomycetales;f__Pichiaceae;g__Pichia;s__Pichia_fermentans           |
| OTU_435 | k__Fungi;p__c__;o__f__;g__;s__                                                                                        |
| OTU_436 | k__Fungi;p__c__;o__f__;g__;s__                                                                                        |
| OTU_437 | k__Fungi;p__Basidiomycota;c__Tremellomycetes;o__Tremellales;f__;g__;s__                                               |
| OTU_438 | k__Fungi;p__c__;o__f__;g__;s__                                                                                        |
| OTU_439 | k__Fungi;p__Ascomycota;c__Saccharomycetes;o__Saccharomycetales;f__Dipodascaceae;g__Dipodascus;s__                     |
| OTU_440 | k__Fungi;p__c__;o__f__;g__;s__                                                                                        |
| OTU_441 | k__Fungi;p__Basidiomycota;c__Agaricomycetes;o__Gomphales;f__Gomphaceae;g__Ramaria;s__                                 |
| OTU_442 | k__Fungi;p__Ascomycota;c__Dothideomycetes;o__Dothideales;f__Aureobasidiaceae;g__Aureobasidium;s__                     |
| OTU_443 | k__Fungi;p__c__;o__f__;g__;s__                                                                                        |

---

---

|         |                                                                                                                                                 |
|---------|-------------------------------------------------------------------------------------------------------------------------------------------------|
| OTU_444 | k__Fungi;p__c__o__f__g__s__                                                                                                                     |
| OTU_445 | k__Fungi;p__Basidiomycota;c__Agaricomycetes;o__Agaricales;f__Amanitaceae;g__Amanita;s__                                                         |
| OTU_446 | k__Fungi;p__Mortierellomycota;c__Mortierellomycetes;o__Mortierellales;f__Mortierellaceae;g__s__                                                 |
| OTU_447 | k__Fungi;p__Basidiomycota;c__Agaricomycetes;o__Agaricales;f__Pleurotaceae;g__Pleurotus;s__                                                      |
| OTU_448 | k__Fungi;p__c__o__f__g__s__                                                                                                                     |
| OTU_449 | k__Fungi;p__Ascomycota;c__Saccharomycetes;o__Saccharomycetales;f__Dipodascaceae;g__Dipodascus;s__                                               |
| OTU_450 | k__Fungi;p__Ascomycota;c__Eurotiomycetes;o__Eurotiales;f__Aspergillaceae;g__Penicillium;s__                                                     |
| OTU_451 | k__Fungi;p__c__o__f__g__s__                                                                                                                     |
| OTU_452 | k__Fungi;p__c__o__f__g__s__                                                                                                                     |
| OTU_453 | k__Fungi;p__Ascomycota;c__Saccharomycetes;o__Saccharomycetales;f__Dipodascaceae;g__Dipodascus;s__                                               |
| OTU_454 | No blast hit                                                                                                                                    |
| OTU_455 | k__Fungi;p__Ascomycota;c__Saccharomycetes;o__Saccharomycetales;f__Dipodascaceae;g__Dipodascus;s__                                               |
| OTU_456 | k__Fungi;p__Ascomycota;c__Eurotiomycetes;o__Eurotiales;f__Aspergillaceae;g__Aspergillus;s__                                                     |
| OTU_457 | k__Fungi;p__c__o__f__g__s__                                                                                                                     |
| OTU_458 | k__Fungi;p__c__o__f__g__s__                                                                                                                     |
| OTU_459 | k__Fungi;p__c__o__f__g__s__                                                                                                                     |
| OTU_460 | k__Fungi;p__c__o__f__g__s__                                                                                                                     |
| OTU_461 | k__Fungi;p__Ascomycota;c__Eurotiomycetes;o__Eurotiales;f__Aspergillaceae;g__Penicillium;s__                                                     |
| OTU_462 | k__Fungi;p__Basidiomycota;c__Agaricomycetes;o__Agaricales;f__Tricholomataceae;g__Tricholoma;s__Tricholoma_<br>portentosum                       |
| OTU_463 | k__Fungi;p__c__o__f__g__s__                                                                                                                     |
| OTU_464 | k__Fungi;p__Ascomycota;c__Saccharomycetes;o__Saccharomycetales;f__Debaryomycetaceae;g__Meyerozyma;s__                                           |
| OTU_465 | k__Fungi;p__Ascomycota;c__Saccharomycetes;o__Saccharomycetales;f__Debaryomycetaceae;g__Meyerozyma;s__                                           |
| OTU_466 | k__Fungi;p__Ascomycota;c__Eurotiomycetes;o__Eurotiales;f__Aspergillaceae;g__Penicillium;s__                                                     |
| OTU_467 | k__Fungi;p__c__o__f__g__s__                                                                                                                     |
| OTU_468 | k__Fungi;p__c__o__f__g__s__                                                                                                                     |
| OTU_469 | k__Fungi;p__Ascomycota;c__Dothideomycetes;o__Capnodiales;f__Mycosphaerellaceae;g__Zasmidium;s__                                                 |
| OTU_470 | k__Fungi;p__c__o__f__g__s__                                                                                                                     |
| OTU_471 | k__Fungi;p__Basidiomycota;c__Agaricomycetes;o__Agaricales;f__Amanitaceae;g__Amanita;s__                                                         |
| OTU_472 | k__Fungi;p__Basidiomycota;c__Microbotryomycetes;o__Sporidiobolales;f__Sporidiobolaceae;g__Rhodosporidiobolu<br>s;s__Rhodosporidiobolus_odoratus |
| OTU_473 | k__Fungi;p__c__o__f__g__s__                                                                                                                     |
| OTU_474 | k__Fungi;p__Ascomycota;c__Eurotiomycetes;o__Eurotiales;f__Trichocomaceae;g__Talaromyces;s__                                                     |
| OTU_475 | k__Fungi;p__Ascomycota;c__Sordariomycetes;o__Hypocreales;f__Nectriaceae;g__Stephanonectria;s__Stephanonectr<br>ia_keithii                       |
| OTU_476 | k__Fungi;p__c__o__f__g__s__                                                                                                                     |
| OTU_477 | k__Fungi;p__Ascomycota;c__Saccharomycetes;o__Saccharomycetales;f__Dipodascaceae;g__Dipodascus;s__                                               |
| OTU_478 | k__Fungi;p__c__o__f__g__s__                                                                                                                     |
| OTU_479 | k__Fungi;p__c__o__f__g__s__                                                                                                                     |
| OTU_480 | k__Fungi;p__Ascomycota;c__Saccharomycetes;o__Saccharomycetales;f__Debaryomycetaceae;g__Meyerozyma;s__                                           |
| OTU_481 | k__Fungi;p__Ascomycota;c__Leotiomycetes;o__Thelebolales;f__Pseudeurotiaceae;g__Pseudogymnoascus;s__Pseudo<br>gymnoascus_roseus                  |
| OTU_482 | k__Fungi;p__c__o__f__g__s__                                                                                                                     |
| OTU_483 | No blast hit                                                                                                                                    |
| OTU_484 | k__Fungi;p__Ascomycota;c__Dothideomycetes;o__Capnodiales;f__Cladosporiaceae;g__Cladosporium;s__                                                 |
| OTU_485 | k__Fungi;p__c__o__f__g__s__                                                                                                                     |
| OTU_486 | k__Fungi;p__c__o__f__g__s__                                                                                                                     |
| OTU_487 | k__Fungi;p__Ascomycota;c__Dothideomycetes;o__Pleosporales;f__Sporormiaceae;g__Preussia;s__                                                      |
| OTU_488 | k__Fungi;p__c__o__f__g__s__                                                                                                                     |
| OTU_489 | k__Fungi;p__Ascomycota;c__Eurotiomycetes;o__Eurotiales;f__Elaphomycetaceae;g__Elaphomyces;s__                                                   |
| OTU_490 | k__Fungi;p__Ascomycota;c__Eurotiomycetes;o__Eurotiales;f__Aspergillaceae;g__Aspergillus;s__                                                     |
| OTU_491 | k__Fungi;p__Ascomycota;c__Saccharomycetes;o__Saccharomycetales;f__Dipodascaceae;g__Dipodascus;s__                                               |
| OTU_492 | k__Fungi;p__Ascomycota;c__Saccharomycetes;o__Saccharomycetales;f__Dipodascaceae;g__Dipodascus;s__                                               |
| OTU_493 | k__Fungi;p__Ascomycota;c__Saccharomycetes;o__Saccharomycetales;f__Saccharomycetales_fam_Incertae_sedis;g__<br>Candida;s__                       |
| OTU_494 | k__Fungi;p__Ascomycota;c__Sordariomycetes;o__Hypocreales;f__Nectriaceae;g__Fusicolla;s__                                                        |
| OTU_495 | k__Fungi;p__Ascomycota;c__Saccharomycetes;o__Saccharomycetales;f__Debaryomycetaceae;g__Meyerozyma;s__                                           |

---

---

|         |                                                                                                                       |
|---------|-----------------------------------------------------------------------------------------------------------------------|
| OTU_496 | k__Fungi;p__Basidiomycota;c__Tremellomycetes;o__Tremellales;f__Rhynchogastremataceae;g__Papiliotrema;s__              |
| OTU_497 | k__Fungi;p__c__o__f__g__s__                                                                                           |
| OTU_498 | k__Fungi;p__c__o__f__g__s__                                                                                           |
| OTU_499 | k__Fungi;p__Basidiomycota;c__Wallemiomycetes;o__Wallemiales;f__Wallemiaceae;g__Wallemia;s__                           |
| OTU_500 | k__Fungi;p__Ascomycota;c__Eurotiomycetes;o__Eurotiales;f__Aspergillaceae;g__Aspergillus;s__                           |
| OTU_501 | k__Fungi;p__Ascomycota;c__Eurotiomycetes;o__Eurotiales;f__Aspergillaceae;g__Aspergillus;s__                           |
| OTU_502 | k__Fungi;p__c__o__f__g__s__                                                                                           |
| OTU_503 | k__Fungi;p__c__o__f__g__s__                                                                                           |
| OTU_504 | k__Fungi;p__c__o__f__g__s__                                                                                           |
| OTU_505 | k__Fungi;p__Ascomycota;c__Eurotiomycetes;o__Eurotiales;f__Aspergillaceae;g__Penicillium;s__                           |
| OTU_506 | k__Fungi;p__c__o__f__g__s__                                                                                           |
| OTU_507 | k__Fungi;p__Ascomycota;c__Sordariomycetes;o__Hypocreales;f__Nectriaceae;g__s__                                        |
| OTU_508 | k__Fungi;p__Basidiomycota;c__Agaricomycetes;o__Atheliales;f__Atheliaceae;g__Piloderma;s__                             |
| OTU_509 | k__Fungi;p__Ascomycota;c__Saccharomycetes;o__Saccharomycetales;f__Saccharomycodaceae;g__Hanseniaspora;s__             |
| OTU_510 | No blast hit                                                                                                          |
| OTU_511 | k__Fungi;p__Ascomycota;c__Eurotiomycetes;o__Eurotiales;f__Aspergillaceae;g__Monascus;s__                              |
| OTU_512 | k__Fungi;p__c__o__f__g__s__                                                                                           |
| OTU_513 | k__Fungi;p__Basidiomycota;c__o__f__g__s__                                                                             |
| OTU_514 | k__Fungi;p__Ascomycota;c__Saccharomycetes;o__Saccharomycetales;f__Dipodascaceae;g__s__                                |
| OTU_515 | k__Fungi;p__Ascomycota;c__Eurotiomycetes;o__Eurotiales;f__Aspergillaceae;g__Penicillium;s__                           |
| OTU_516 | k__Fungi;p__Ascomycota;c__Saccharomycetes;o__Saccharomycetales;f__Dipodascaceae;g__Dipodascus;s__                     |
| OTU_517 | k__Fungi;p__c__o__f__g__s__                                                                                           |
| OTU_518 | No blast hit                                                                                                          |
| OTU_519 | k__Fungi;p__c__o__f__g__s__                                                                                           |
| OTU_520 | k__Fungi;p__c__o__f__g__s__                                                                                           |
| OTU_521 | k__Fungi;p__Ascomycota;c__Saccharomycetes;o__Saccharomycetales;f__Saccharomycetales_fam_Incertae_sedis;g__Candida;s__ |
| OTU_522 | k__Fungi;p__Ascomycota;c__Eurotiomycetes;o__Eurotiales;f__Aspergillaceae;g__Penicillium;s__                           |
| OTU_523 | k__Fungi;p__Basidiomycota;c__Agaricomycetes;o__Russulales;f__Russulaceae;g__Lactifluus;s__                            |
| OTU_524 | k__Fungi;p__c__o__f__g__s__                                                                                           |
| OTU_525 | k__Fungi;p__Ascomycota;c__Dothideomycetes;o__Capnodiales;f__Mycosphaerellaceae;g__Cercospora;s__                      |
| OTU_526 | k__Fungi;p__c__o__f__g__s__                                                                                           |
| OTU_527 | k__Fungi;p__Ascomycota;c__Sordariomycetes;o__Hypocreales;f__Nectriaceae;g__Fusarium;s__                               |
| OTU_528 | k__Fungi;p__Ascomycota;c__o__f__g__s__                                                                                |
| OTU_529 | k__Fungi;p__c__o__f__g__s__                                                                                           |
| OTU_530 | k__Fungi;p__Ascomycota;c__Saccharomycetes;o__Saccharomycetales;f__Dipodascaceae;g__Dipodascus;s__                     |
| OTU_531 | k__Fungi;p__c__o__f__g__s__                                                                                           |
| OTU_532 | k__Fungi;p__Ascomycota;c__Eurotiomycetes;o__Eurotiales;f__Aspergillaceae;g__Penicillium;s__                           |
| OTU_533 | k__Fungi;p__c__o__f__g__s__                                                                                           |
| OTU_534 | k__Fungi;p__Ascomycota;c__Eurotiomycetes;o__Eurotiales;f__Aspergillaceae;g__Aspergillus;s__                           |
| OTU_535 | k__Fungi;p__c__o__f__g__s__                                                                                           |
| OTU_536 | k__Fungi;p__Ascomycota;c__o__f__g__s__                                                                                |
| OTU_537 | k__Fungi;p__Ascomycota;c__Saccharomycetes;o__Saccharomycetales;f__Saccharomycetales_fam_Incertae_sedis;g__Candida;s__ |
| OTU_538 | k__Fungi;p__c__o__f__g__s__                                                                                           |
| OTU_539 | k__Fungi;p__c__o__f__g__s__                                                                                           |
| OTU_540 | k__Fungi;p__Ascomycota;c__Dothideomycetes;o__Pleosporales;f__g__s__                                                   |
| OTU_541 | k__Fungi;p__Ascomycota;c__Eurotiomycetes;o__Eurotiales;f__Aspergillaceae;g__Monascus;s__                              |
| OTU_542 | k__Fungi;p__c__o__f__g__s__                                                                                           |
| OTU_543 | k__Fungi;p__c__o__f__g__s__                                                                                           |
| OTU_544 | k__Fungi;p__Ascomycota;c__Dothideomycetes;o__Pleosporales;f__Pleosporales_fam_Incertae_sedis;g__Latorua;s__           |
| OTU_545 | k__Fungi;p__c__o__f__g__s__                                                                                           |
| OTU_546 | k__Fungi;p__c__o__f__g__s__                                                                                           |
| OTU_547 | k__Fungi;p__Ascomycota;c__Saccharomycetes;o__Saccharomycetales;f__Saccharomycetales_fam_Incertae_sedis;g__Candida;s__ |
| OTU_548 | k__Fungi;p__c__o__f__g__s__                                                                                           |

---

---

|         |                                                                                                                              |
|---------|------------------------------------------------------------------------------------------------------------------------------|
| OTU_549 | k__Fungi;p__c__;o__;f__;g__;s__                                                                                              |
| OTU_550 | k__Fungi;p__c__;o__;f__;g__;s__                                                                                              |
| OTU_551 | k__Fungi;p__Ascomycota;c__Eurotiomycetes;o__Chaetothyriales;f__Cyphellophoraceae;g__Cyphellophora;s__                        |
| OTU_552 | k__Fungi;p__Basidiomycota;c__Exobasidiomycetes;o__Exobasidiales;f__Brachybasidiaceae;g__Meira;s__                            |
| OTU_553 | k__Fungi;p__c__;o__;f__;g__;s__                                                                                              |
| OTU_554 | k__Fungi;p__Ascomycota;c__Saccharomycetes;o__Saccharomycetales;f__Dipodascaceae;g__Dipodascus;s__                            |
| OTU_555 | k__Fungi;p__Ascomycota;c__Eurotiomycetes;o__Eurotiales;f__Aspergillaceae;g__Monascus;s__                                     |
| OTU_556 | k__Fungi;p__Ascomycota;c__Dothideomycetes;o__Pleosporales;f__;g__;s__                                                        |
| OTU_557 | k__Fungi;p__Ascomycota;c__Saccharomycetes;o__Saccharomycetales;f__Dipodascaceae;g__Dipodascus;s__                            |
| OTU_558 | k__Fungi;p__Basidiomycota;c__Tremellomycetes;o__Tremellales;f__Rhynchogastremataceae;g__Papiliotrema;s__                     |
| OTU_559 | k__Fungi;p__c__;o__;f__;g__;s__                                                                                              |
| OTU_560 | k__Fungi;p__Ascomycota;c__Sordariomycetes;o__Sordariales;f__Cephalothecaceae;g__Phialemonium;s__Phialemonium_dimorphosporum  |
| OTU_561 | k__Fungi;p__Ascomycota;c__Saccharomycetes;o__Saccharomycetales;f__Dipodascaceae;g__Dipodascus;s__                            |
| OTU_562 | k__Fungi;p__Ascomycota;c__Dothideomycetes;o__Capnodiales;f__Cladosporiaceae;g__Cladosporium;s__                              |
| OTU_563 | k__Fungi;p__Basidiomycota;c__Agaricomycetes;o__Agaricales;f__Clavariaceae;g__Clavaria;s__                                    |
| OTU_564 | k__Fungi;p__c__;o__;f__;g__;s__                                                                                              |
| OTU_565 | k__Fungi;p__c__;o__;f__;g__;s__                                                                                              |
| OTU_566 | k__Fungi;p__c__;o__;f__;g__;s__                                                                                              |
| OTU_567 | k__Fungi;p__c__;o__;f__;g__;s__                                                                                              |
| OTU_568 | k__Fungi;p__Basidiomycota;c__Tremellomycetes;o__Tremellales;f__Rhynchogastremataceae;g__Papiliotrema;s__                     |
| OTU_569 | k__Fungi;p__c__;o__;f__;g__;s__                                                                                              |
| OTU_570 | k__Fungi;p__Ascomycota;c__Dothideomycetes;o__Capnodiales;f__Mycosphaerellaceae;g__Mycocentrospora;s__Mycocentrospora_acerina |
| OTU_571 | k__Fungi;p__Rozellomycota;c__;o__;f__;g__;s__                                                                                |
| OTU_572 | k__Fungi;p__Ascomycota;c__Eurotiomycetes;o__Eurotiales;f__Aspergillaceae;g__Penicillium;s__                                  |
| OTU_573 | k__Fungi;p__Ascomycota;c__Saccharomycetes;o__Saccharomycetales;f__Dipodascaceae;g__;s__                                      |
| OTU_574 | k__Fungi;p__c__;o__;f__;g__;s__                                                                                              |
| OTU_575 | k__Fungi;p__Ascomycota;c__Sordariomycetes;o__;f__;g__;s__                                                                    |
| OTU_576 | k__Fungi;p__c__;o__;f__;g__;s__                                                                                              |
| OTU_577 | k__Fungi;p__Ascomycota;c__Pezizomycetes;o__Pezizales;f__Pyronemataceae;g__Byssonectria;s__                                   |
| OTU_578 | k__Fungi;p__c__;o__;f__;g__;s__                                                                                              |
| OTU_579 | k__Fungi;p__c__;o__;f__;g__;s__                                                                                              |

---

**Table S2.** The species and relative abundance of harmful fungi in each sample.

17

| Sample ID | <i>Trichoderma atroviride</i> | <i>Fusarium equiseti</i> |
|-----------|-------------------------------|--------------------------|
| MCK1      | 0.1017%                       | 0.0458%                  |
| MCK2      | 0.1271%                       | 0.0051%                  |
| MCK3      | 0.2695%                       | 0.0000%                  |
| GDM1      | 0.1703%                       | 0.0000%                  |
| GDM2      | 0.1805%                       | 0.0000%                  |
| GDM3      | 0.1703%                       | 0.0000%                  |
| GXM1      | 0.0483%                       | 0.0000%                  |
| GXM2      | 0.1068%                       | 0.0000%                  |
| GXM3      | 0.1017%                       | 0.0000%                  |
| ACK1      | 0.1424%                       | 0.0025%                  |
| ACK2      | 0.0483%                       | 0.0000%                  |
| ACK3      | 0.3381%                       | 0.0025%                  |
| HNA1      | 0.0763%                       | 0.0000%                  |
| HNA2      | 0.0686%                       | 0.0000%                  |
| HNA3      | 0.0381%                       | 0.0000%                  |
| GXA1      | 0.0483%                       | 0.0000%                  |
| GXA2      | 0.0356%                       | 0.0000%                  |
| GXA3      | 0.0508%                       | 0.0000%                  |

18
